# Supplementary material
Source: Springer Nature journal article supplement (https://www.springermedizin.de/resource/supplementary/12885_2009_1521_MOESM2_ESM.pdf/9472226)
Supplement: MOESM2 [file 9472226]

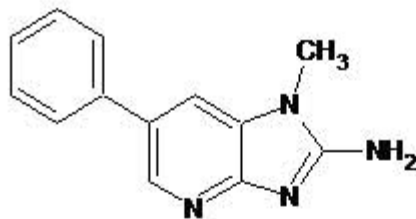

PhIP

CYP1A1/CYP1A2

CYP1A1/CYP1A2

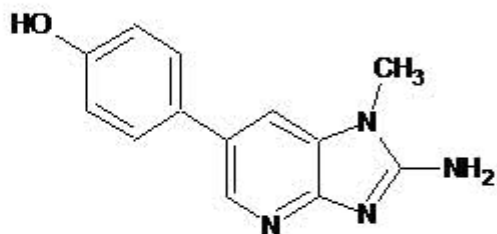

4' OH metabolite

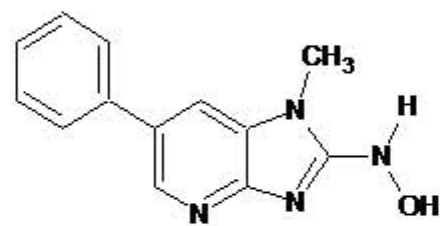

N<sup>2</sup> hydroxylated  
metabolite

Acetoxy, sulfonyloxy esters

DNA adducts
